# Prognostic Significance of the Ratio of Absolute Neutrophil Count to Absolute Lymphocyte Count in Classic Hodgkin Lymphoma

Young Wha Koh, MD,<sup>1</sup> Hyo Jeong Kang, MD,<sup>1</sup> Chansik Park, MD,<sup>1</sup> Dok Hyun Yoon, MD,<sup>2</sup> Shin Kim, RN,<sup>2</sup> Cheolwon Suh, MD,<sup>3</sup> Ji Eun Kim, MD,<sup>4</sup> Chul-Woo Kim, MD,<sup>4</sup> Jooryung Huh, MD<sup>1</sup>

**Key Words:** Hodgkin lymphoma; Neutrophil; Lymphocyte; Neutrophil/lymphocyte ratio; Prognosis

DOI: 10.1309/AJCPO46GFKGNXCBR

Upon completion of this activity you will be able to:

- predict prognosis in patients with classic Hodgkin lymphoma using the ratio of absolute neutrophil count to absolute lymphocyte count (ANC/ALC).
- differentiate a high-risk group among patients who are considered to be at low risk on the basis of an International Prognostic Score <4 using the ANC/ALC ratio.
- recognize the effect of the ANC/ALC ratio in combination with the ALC to absolute monocyte count ratio for survival prediction of classic Hodgkin lymphoma.

The ASCP is accredited by the Accreditation Council for Continuing Medical Education to provide continuing medical education for physicians. The ASCP designates this journal-based CME activity for a maximum of 1 *AMA PRA Category 1 Credit*™ per article. Physicians should claim only the credit commensurate with the extent of their participation in the activity. This activity qualifies as an American Board of Pathology Maintenance of Certification Part II Self-Assessment Module.

The authors of this article and the planning committee members and staff have no relevant financial relationships with commercial interests to disclose. Questions appear on p 905. Exam is located at [www.ascp.org/ajcpme](http://www.ascp.org/ajcpme).

## Abstract

*The aim of this study was to determine the prognostic effect of the absolute neutrophil count/absolute lymphocyte count ratio (ANC/ALC ratio) in patients with classic Hodgkin lymphoma (cHL). We performed a retrospective analysis of 312 patients with cHL. Univariate analysis revealed that a high ANC/ALC ratio ( $\geq 4.3$ ) correlated with poor overall survival (OS) ( $P < .001$ ). Subgroup analysis of advanced-stage disease showed that the ANC/ALC ratio was significant for OS ( $P = .032$ ). Multivariate analysis revealed the ANC/ALC ratio to be an independent prognostic factor for OS ( $P = .048$ ). The ANC/ALC ratio allowed further risk stratification in patients who were considered to be at low risk on the basis of an International Prognostic Score less than 4 ( $P = .002$ ). The ANC/ALC ratio is a simple, inexpensive, and independent prognostic factor for OS that may improve the ability to identify high-risk patients with cHL.*

The current gold standard for risk stratification in Hodgkin lymphoma (HL) is the International Prognostic Score (IPS).<sup>1</sup> Although most cases of HL are indolent and can be cured, 34% to 37% of advanced-stage HLs recur or progress after first-line therapy.<sup>2</sup> On the other hand, approximately 20% of patients receive unnecessary treatment and thus are exposed to the risk of long-term complications.<sup>3</sup> To address this issue and better stratify the risk, tests for various prognostic factors have been suggested, including gene expression profiling,<sup>4,5</sup> immunohistochemical analysis of biomarkers,<sup>6,7</sup> and positron emission tomography.<sup>8,9</sup> However, these approaches are expensive, technically demanding, and not easily accessible. Therefore, prognostic models for classic HL (cHL) that are inexpensive, simple, and easy to perform and interpret are needed.

The histologic hallmark of cHL is the very small minority of Reed-Sternberg cells (usually <2%) in a background of bystander cells (usually >98%). This background, known as the tumor microenvironment, was recently shown to have not only pathogenetic but also prognostic significance.<sup>5,7,10,11</sup> Tumor-infiltrating lymphocytes and tumor-infiltrating macrophages are reported to be prognostic factors for survival in patients with cHL.<sup>5,7,10,11</sup> Because tissue inflammatory cells originate from the blood and are controlled by common cytokines, the peripheral blood (PB) count of these cells in patients with cHL may reflect the cytokine and immunologic profile of the tumor in these patients. It has long been known that the baseline lymphocyte count has a prognostic role in cHL—lymphopenia (<600 cells/ $\mu$ L or <8% of the WBC count) is related to adverse survival outcome.<sup>1</sup> Furthermore,

recent studies, including our previous report, reveal that the PB lymphocyte/monocyte ratio at diagnosis also has prognostic significance in cHL.<sup>12,13</sup> In addition, PB neutrophil counts have been associated with survival in solid tumors.<sup>14,15</sup> A recent study of the PB neutrophil/lymphocyte ratio in patients with diffuse large B-cell lymphoma showed that patients with a neutrophil/lymphocyte ratio less than 3.5 at diagnosis had a superior overall survival (OS) and progression-free survival.<sup>16</sup> It has been suggested that a high number of neutrophils may actually promote tumor growth and metastasis<sup>17</sup> and/or inhibit lymphocyte activity, thereby counteracting the antitumor immune response.<sup>18-21</sup> These observations suggest that an imbalance in the ratio of neutrophil to lymphocyte in the PB of patients with cancer may be related to tumor development.

The prognostic significance of biomarkers that combine PB neutrophil and lymphocyte numbers in patients with cHL has not yet been studied. Thus, we investigated whether the ratio of absolute neutrophil count (ANC) to absolute lymphocyte count (ANC/ALC ratio) in PB at diagnosis is a predictor of survival in patients with cHL. Receiver operating characteristic (ROC) curve analysis was used to determine the optimal cutoff values. We then correlated the findings of this analysis with our previous data of the PB lymphocyte/monocyte ratio at diagnosis in the same cohort of patients with cHL.<sup>13</sup>

## Materials and Methods

### Patients

We carried out a retrospective study of 312 patients with cHL, including 254 patients from Asan Medical Center, Seoul, South Korea (1990-2011) and 58 patients from Seoul National University Boramae Medical Center (1996-2010), who met the following criteria: biopsy-proven cHL; no previous treatment or history of malignancy, transplantation, immunosuppression, or anti-HIV positivity. All patients received combination chemotherapy with or without radiation treatment.

The ANC, ALC, and absolute monocyte count (AMC) were obtained from the routine CBC with 4-part differential counts (lymphocytes, monocytes, eosinophils, and neutrophils) using the Sysmex automated hematology analyzers (models Sysmex E-4000, Sysmex SE-9000, and Sysmex XE-2100; Sysmex, Kobe, Japan) at the time of the diagnosis of cHL.<sup>22</sup>

Response criteria were based on standard guidelines. Routine follow-up imaging analyses were performed every 3 months for the first 2 years, every 6 months for the next 3 years, and then annually or whenever clinically indicated.

In situ hybridization analysis for Epstein-Barr virus-encoded RNA-1 and RNA-2 was performed and scored as described elsewhere.<sup>23</sup>

### Statistical Analysis

OS was defined as the time between the first day of diagnosis and the date of death from any cause or the last follow-up. Event-free survival (EFS) was defined as the interval between the first day of diagnosis and the date of disease progression, relapse, death from any cause, or last follow-up. OS and EFS rates were estimated by using the Kaplan-Meier method and compared by using the log-rank test. Multivariate prognostic analyses were performed for OS and EFS by using the Cox proportional hazards regression model. The backward (conditional) method was used to determine the final Cox model for multivariate analysis. The optimal cutoff point was decided by using ROC curve analysis—the value with the maximum joint sensitivity and specificity was selected. The binary clinical outcome (death/survival) was determined at 5 years after diagnosis. Patients were categorized as “alive/censored” when the follow-up time was longer than 5 years and “dead” if the patient had died before this time point.<sup>24</sup> Categorical variables were compared by using  $\chi^2$  tests (2-sided Pearson or linear-by-linear association). Continuous variables were compared with the Mann-Whitney *U* Test. All statistical analyses were performed using the SPSS version 18.0 statistical software program (SPSS, Chicago, IL). The results were considered to be statistically significant when the *P* value was less than .05.

## Results

### Patient Characteristics

Patient age ranged from 4 to 77 years (median, 37 years). There were 188 (60.3%) male and 124 (39.7%) female patients. Nodular sclerosis was the most common subtype, noted in 177 (56.7%), followed by 90 (28.8%) cases of the mixed cellularity subtype, 12 (3.8%) cases of the lymphocyte-rich subtype, 9 (2.9%) cases of the lymphocyte-depleted subtype, and 24 (7.7%) cases that were “not otherwise specified.” Based on Ann Arbor staging, 42 patients were stage I, 112 were stage II, 73 were stage III, and 85 were stage IV. A minority of patients (36.2%) presented with B symptoms or high-risk IPS (19.2%). Increased levels of lactate dehydrogenase (LDH) were found in 177 (56.7%) patients. A majority of patients (210/312; 67.3%) received chemotherapy only and 102 (32.7%) patients were treated with chemoradiotherapy. Treatment regimens included doxorubicin, bleomycin, vinblastine, and dacarbazine (ABVD) for 189 patients; mechlorethamine, vincristine, procarbazine, and prednisone (MOPP) for 13; ABVD/MOPP hybrid for 21; bleomycin, etoposide, doxorubicin, cyclophosphamide, vincristine, procarbazine, and prednisolone for 10; and other forms of chemotherapy for 21 patients. The median follow-up after diagnosis was 64 months for the entire cohort (range, 0.1-245 mo) and 71 months for censored patients (range, 2-245 mo). We recorded relapse, disease progression,

or death in 100 patients. Median EFS was 36 months (95% confidence interval [CI], 28-40 mo). An estimated 5-year OS and EFS of 86.4% and 64.2%, respectively, was observed. At diagnosis, the median ANC was 5,569 cells/ $\mu$ L ( $5.57 \times 10^9/L$ ; range, 336-30,056 cells/ $\mu$ L [ $0.34$ - $30.06 \times 10^9/L$ ]), the median ALC was 1,561 cells/ $\mu$ L ( $1.56 \times 10^9/L$ ; range, 56-7,276 cells/ $\mu$ L [ $0.06$ - $7.28 \times 10^9/L$ ]), and the median ANC/ALC ratio was 3.8 (range, 0.09-29.67).

**Determining the Cutoff Value of the ANC/ALC Ratio**

An ROC curve of the ANC/ALC ratio according to survival was generated to determine the cutoff value. The area under the curve was recorded as 0.63 (95% CI, 0.536-0.724)

**Figure 1**. An ANC/ALC value of 4.3 corresponded to the maximum combined sensitivity and specificity on the ROC curve (66% sensitivity and 59% specificity).

**Correlation of ANC/ALC Ratio With Clinicopathologic Variables**

To evaluate the relevance of the ANC/ALC ratio of 4.3 or higher at diagnosis in patients with cHL, the patients were divided according to the ANC/ALC ratio at diagnosis: the group with an ANC/ALC ratio less than 4.3 contained 177 patients (56.7%), and the group with an ANC/ALC ratio of 4.3 or more contained 135 patients (43.3%). Patients with an ANC/ALC ratio of 4.3 or higher at diagnosis were more likely to present with presence of B symptoms ( $P < .001$ ), advanced disease stage ( $P < .001$ ), abnormal LDH ( $P = .005$ ), lymphopenia ( $P = .014$ ), hypoalbuminemia ( $P = .01$ ), and anemia ( $P < .001$ ). The groups did not differ in terms of age ( $P = .337$ ),

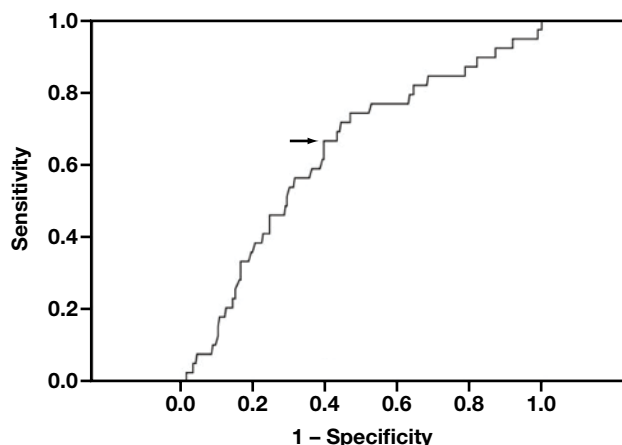

**Figure 1** Receiver operating characteristic and area under the curve (AUC) analysis of the ratio of absolute neutrophil count to absolute lymphocyte count at the diagnosis of classic Hodgkin lymphoma. (AUC = 0.63 [arrow]; 95% confidence interval = 0.536-0.724.)

sex ( $P = .641$ ), treatment method (chemotherapy vs chemoradiotherapy,  $P = .543$ ), chemotherapeutic regimen (ABVD vs non-ABVD,  $P = .876$ ), or Epstein-Barr virus status (positive vs negative,  $P = .131$ ).

**Prognostic Significance of the ANC/ALC Ratio**

Patients with an ANC/ALC ratio of 4.3 or more had a lower OS than those with an ANC/ALC ratio less than 4.3 (5-year OS, 80.3% vs 91.9%;  $P < .001$ ) **Figure 2A** but did not differ significantly in terms of EFS ( $P = .168$ ) **Figure 2B**.

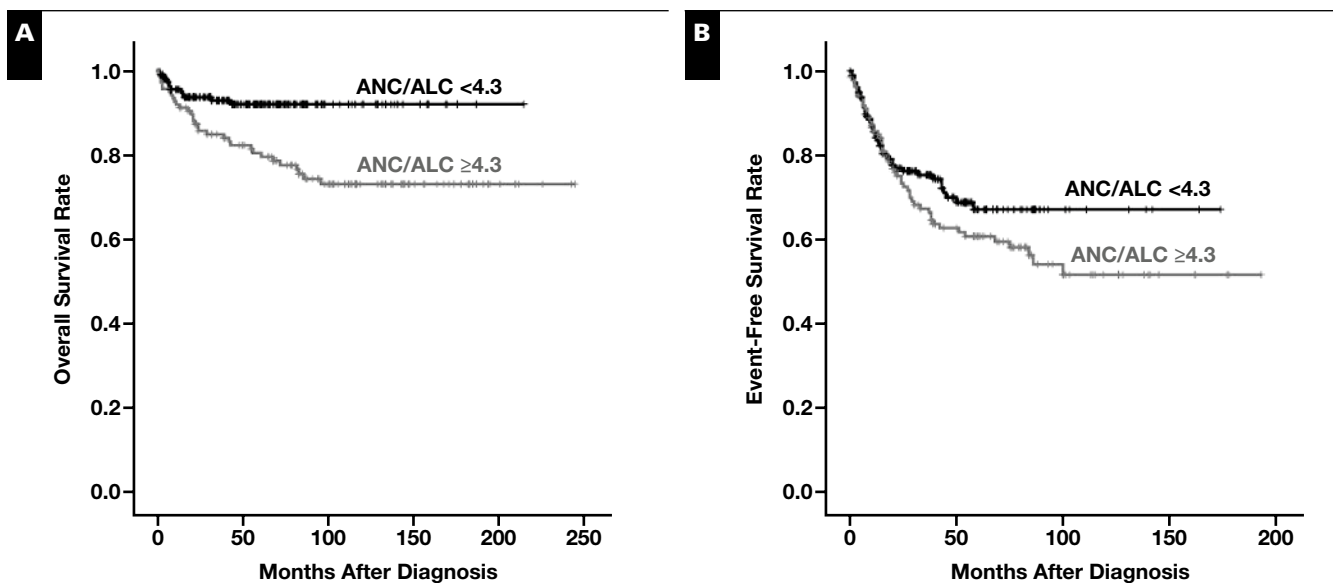

**Figure 2** Overall survival (A) and event-free survival (B) rates, according to the ratio of absolute neutrophil count to absolute lymphocyte count (ANC/ALC) at diagnosis. (A,  $P < .001$ ; B,  $P = .168$ ).

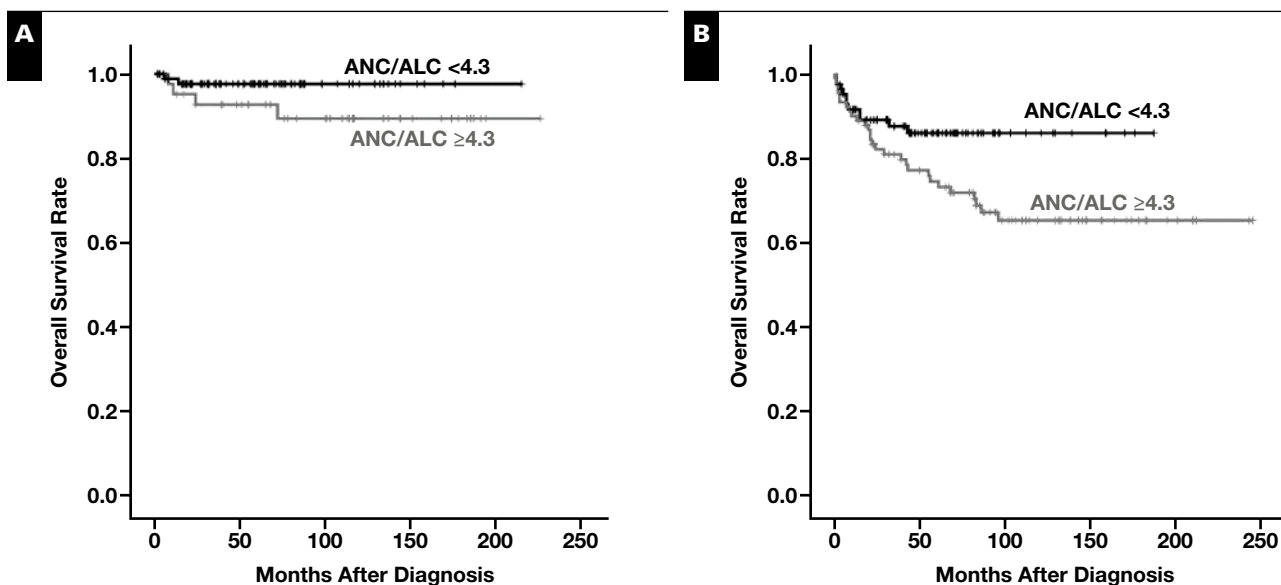

**Figure 3** Overall survival in the subgroups with limited-stage (**A**) and advanced-stage (**B**) disease based on the ratio of absolute neutrophil count to absolute lymphocyte count (ANC/ALC). (**A**,  $P = .108$ ; **B**,  $P = .032$ ).

Subgroups were then analyzed based on stage (limited vs advanced) because some prognostic markers are restricted to certain stages. In the advanced-stage subgroup, patients with an ANC/ALC ratio of 4.3 or more had a lower OS rate than those with an ANC/ALC ratio less than 4.3 ( $P = .032$ ) **Figure 3B**. In the limited-stage subgroup, patients with an ANC/ALC ratio of 4.3 or more and patients with an

ANC/ALC ratio less than 4.3 showed similar OS ( $P = .108$ )

**Figure 3A**.

Univariate analysis revealed that OS correlated significantly with older age (>45 years), B symptoms, abnormal LDH level, hypoalbuminemia, anemia, male sex, higher stage, high IPS ( $\geq 4$ ), and ALC/AMC ratio less than 2.9 **Table 1**. Multivariate analysis adjusting for B symptoms, abnormal

**Table 1**  
Univariate and Multivariate Analysis for OS and EFS

| Covariate                                                          | OS                                                          |        |                 | EFS   |        |                 |       |
|--------------------------------------------------------------------|-------------------------------------------------------------|--------|-----------------|-------|--------|-----------------|-------|
|                                                                    | HR                                                          | 95% CI | <i>P</i> Value* | HR    | 95% CI | <i>P</i> Value* |       |
| Univariate analysis                                                |                                                             |        |                 |       |        |                 |       |
| Age, y                                                             | <45 vs $\geq 45$                                            | 5.669  | 3.02-10.60      | <.001 | 2.564  | 1.72-3.80       | <.001 |
| B symptoms                                                         | (-) vs (+)                                                  | 3.145  | 1.70-5.79       | <.001 | 1.331  | 0.89-1.97       | .156  |
| LDH, U/L ( $\mu\text{kat/L}$ )                                     | <250 (4.1) vs $\geq 250$                                    | 2.863  | 1.375-5.962     | .005  | 1.571  | 1.034-2.388     | .034  |
| Albumin, g/dL (g/L)                                                | $\geq 4$ (40) vs <4                                         | 2.611  | 1.25-5.42       | .010  | 1.517  | 0.99-2.31       | .054  |
| Hemoglobin, g/dL (g/L)                                             | $\geq 10.5$ (105) vs <10.5                                  | 2.754  | 1.52-4.97       | .001  | 1.658  | 1.07-2.55       | .022  |
| Sex                                                                | F vs M                                                      | 2.180  | 1.10-4.29       | .024  | 1.540  | 1.00-2.35       | .046  |
| ALC count, cells/ $\mu\text{L}$ ( $\times 10^9/\text{L}$ )         | $\geq 600$ (0.6) or $\geq 8\%$ of WBC vs <600 or <8% of WBC | 1.919  | 0.855-4.307     | .114  | 1.293  | 0.690-2.424     | .422  |
| WBC, $\times 10^3$ cells/ $\mu\text{L}$ ( $\times 10^9/\text{L}$ ) | $\leq 15$ (15) vs >15                                       | 1.203  | 0.53-2.70       | .654  | 1.338  | 0.77-2.31       | .300  |
| Stage                                                              | 1-3 vs 4                                                    | 3.096  | 1.72-5.55       | <.001 | 1.545  | 1.02-2.33       | .040  |
| IPS                                                                | <4 vs $\geq 4$                                              | 2.710  | 1.48-4.95       | .001  | 1.406  | 0.88-2.22       | .146  |
| Treatment plan                                                     | Chemotherapy only vs chemoradiotherapy                      | 0.581  | 0.294-1.148     | .118  | 0.618  | 0.396-0.962     | .033  |
| Chemotherapeutic regimen                                           | non-ABVD vs ABVD                                            | 0.659  | 0.320-1.359     | .259  | 1.183  | 0.666-2.100     | .567  |
| ALC/AMC ratio                                                      | $\geq 2.9$ vs <2.9                                          | 3.175  | 1.57-6.41       | .001  | 1.226  | 0.82-1.82       | .316  |
| ANC/ALC ratio                                                      | <4.3 vs $\geq 4.3$                                          | 2.841  | 1.486-5.428     | .002  | 1.317  | 0.887-1.954     | .172  |
| Multivariate analysis                                              |                                                             |        |                 |       |        |                 |       |
| ANC/ALC ratio                                                      | <4.3 vs $\geq 4.3$                                          | 1.959  | 1.007-3.811     | .048  | 1.126  | 0.749-1.694     | .568  |
| B symptoms                                                         | (-) vs (+)                                                  | 2.345  | 1.200-4.582     | .013  | 1.204  | 0.785-1.848     | .394  |
| LDH, U/L ( $\mu\text{kat/L}$ )                                     | <250 (4.1) vs $\geq 250$                                    | 2.027  | 0.953-4.312     | .066  | 1.406  | 0.911-2.170     | .124  |
| IPS                                                                | <4 vs $\geq 4$                                              | 1.532  | 0.796-2.947     | .201  | 1.139  | 0.690-1.882     | .610  |

ABVD, doxorubicin, bleomycin, vinblastine, and dacarbazine; ALC, absolute lymphocyte count; AMC, absolute monocyte count; ANC, absolute neutrophil count; CI, confidence interval; EFS, event-free survival; HR, hazard ratio; IPS, International Prognostic Score; LDH, lactate dehydrogenase; OS, overall survival; WBC, white blood cells.

\* Cox univariate analysis.

level of LDH, high IPS ( $\geq 4$ ), and ALC/AMC ratio less than 2.9 showed that an ANC/ALC ratio of 4.3 or more was an independent prognostic marker ( $P = .048$ ).

Because both the ANC/ALC ratio and IPS remained independent prognostic markers, we next determined whether they yielded any additional prognostic value when combined. To evaluate the prognostic effect of IPS, the patients were divided into 2 groups: low-risk with IPS less than 4 and high-risk with IPS of 4 or more. IPS was previously shown to be a significant prognostic factor in advanced-stage disease only.<sup>1</sup>

Similarly, in this study, the prognostic effect of IPS was limited to advanced-stage disease (Figure 4). For low-risk IPS cases, the ANC/ALC ratio enabled further stratification of the risks in these patients: the patients with an ANC/ALC ratio of 4.3 or more were found to have worse outcomes than those with an ANC/ALC ratio less than 4.3 (5-year OS of 83.1% vs 94%,  $P = .002$ ) (Figure 5A). However, in high-risk IPS patients, those with an ANC/ALC ratio of 4.3 or more and those with an ANC/ALC ratio less than 4.3 showed similar OS rates ( $P = .453$ ) (Figure 5B). Our previous study revealed

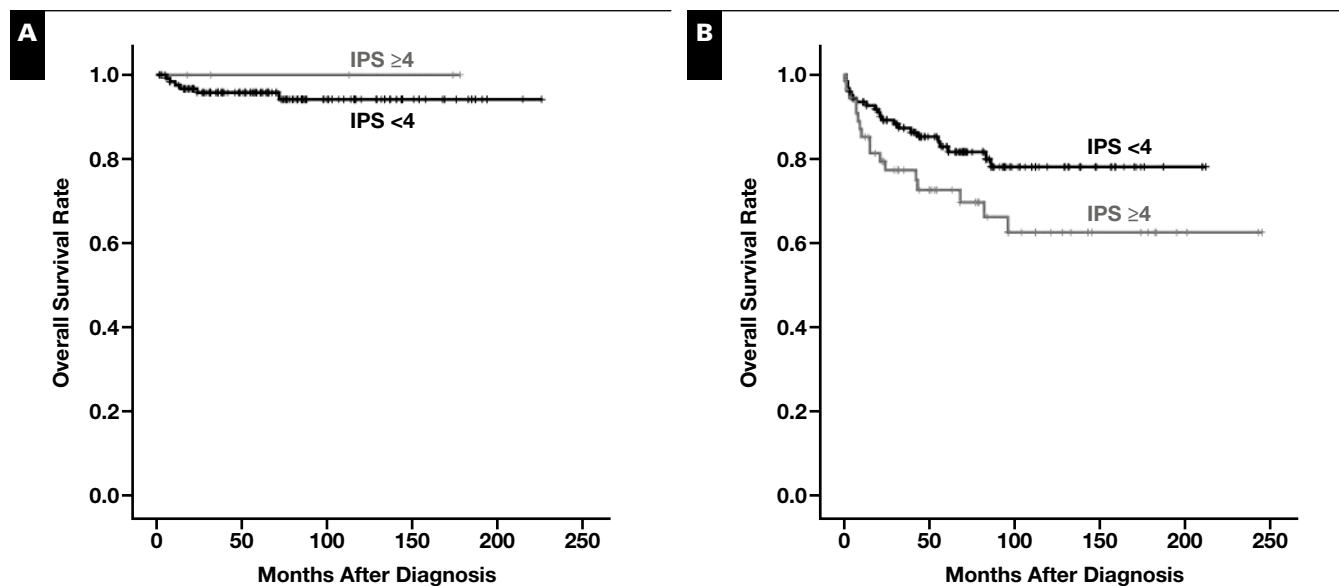

Figure 4 Overall survival in the limited stage (A) and advanced stage (B) subgroups according to the International Prognostic Score (IPS). (A,  $P = .612$ ; B,  $P = .048$ ).

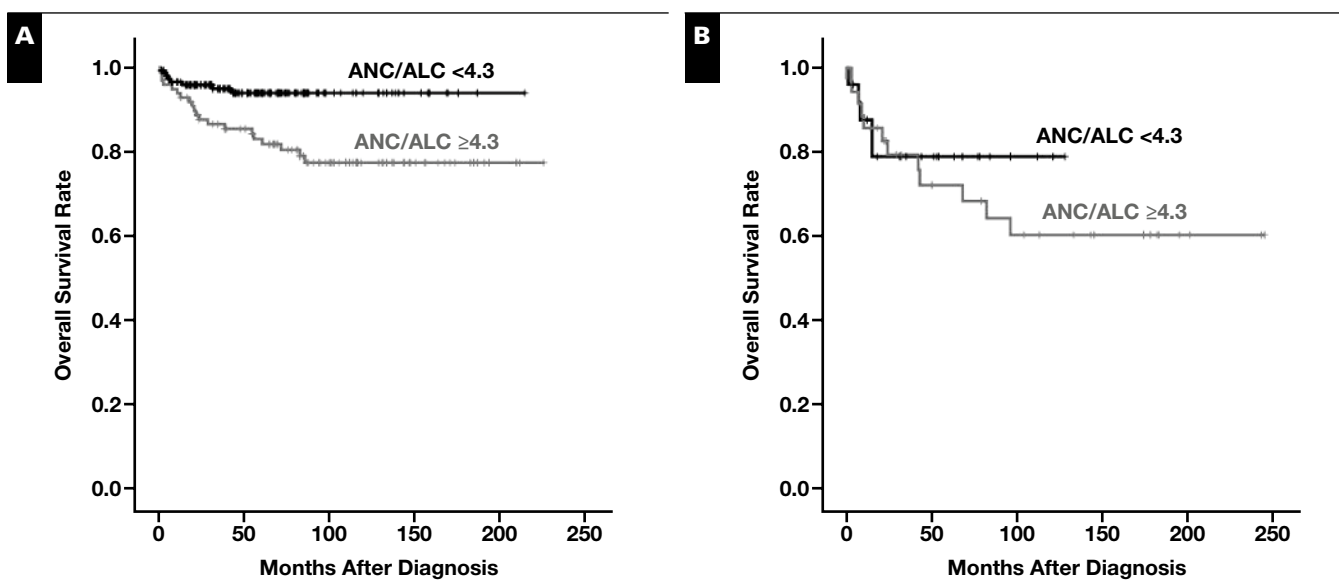

Figure 5 Patients identified by the International Prognostic Score as being either low risk (A) or high risk (B) were further stratified by the ratio of absolute neutrophil count to absolute lymphocyte count (ANC/ALC) prognostic score. (A,  $P = .002$ ; B,  $P = .453$ ).

that an ALC/AMC ratio less than 2.9 at diagnosis was significantly associated with poor OS in cHL.<sup>13</sup> To evaluate the synergistic usefulness of ANC/ALC and ALC/AMC ratios, we combined the dichotomized ANC/ALC and ALC/AMC ratio and stratified patients into 4 groups (ANC/ALC  $\geq 4.3$  and ALC/AMC  $< 2.9$ , ANC/ALC  $\geq 4.3$  and ALC/AMC  $\geq 2.9$ , ANC/ALC  $< 4.3$  and ALC/AMC  $< 2.9$ , ANC/ALC  $< 4.3$  and ALC/AMC  $\geq 2.9$ ). Patients with an ANC/ALC ratio of 4.3 or more and ALC/AMC ratio less than 2.9 had a significantly

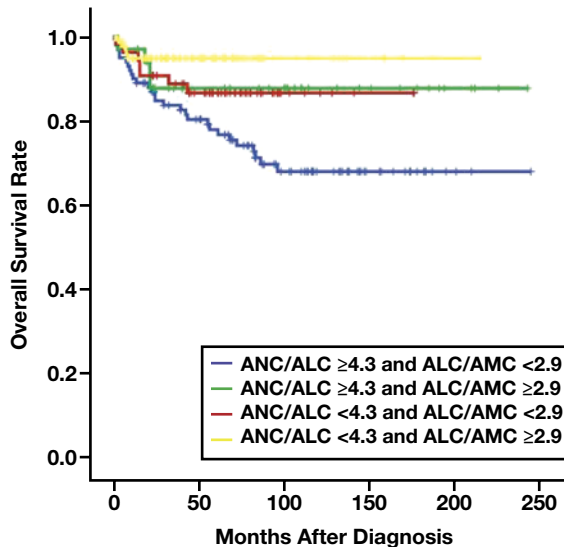

**Figure 6** Comparison of the overall survival according to the patterns seen in the ratio of absolute neutrophil count to absolute lymphocyte count (ANC/ALC) and ratio of ALC to absolute monocyte count (AMC) ( $P < .001$ ).

worse OS rate compared with the remaining groups, while patients with an ANC/ALC ratio less than 4.3 and ALC/AMC ratio of 2.9 or more had a significantly better OS rate than the remaining groups ( $P < .001$ ) **Figure 6**.

When the nodular sclerosis subtype alone was analyzed, patients with an ANC/AMC ratio of 4.3 or more had a lower OS rate than patients with an ANC/AMC ratio less than 4.3 (5-year OS rate, 85.6% vs 96.9%,  $P = .008$ ) **Figure 7A**. The 2 subgroups did not differ in terms of the EFS rate ( $P = .362$ ) **Figure 7B**.

## Discussion

This study has several novel and important aspects. First, it is the first study to evaluate the ANC/ALC ratio as a prognostic factor for survival in patients with cHL. Second, the ANC/ALC ratio provides additional prognostic information when superimposed on the IPS, enabling further stratification in patients with low-risk IPS. Third, the ANC/ALC ratio could predict survival for patients with the nodular sclerosis subtype of cHL. Fourth, the ANC/ALC and the ALC/AMC ratios are synergistic in the prediction of survival in cHL; by combining these 2 ratios, the authors were able to divide patients with cHL into groups with significantly different survival rates. Obtaining the ANC/ALC ratio prognostic score from a CBC at diagnosis is simple, widely available, and can be easily used in clinical practice, especially in resource-poor areas. The limitations of this study include the retrospective nature of the study design, the short follow-up period, and the relatively small sample size of the test participants.

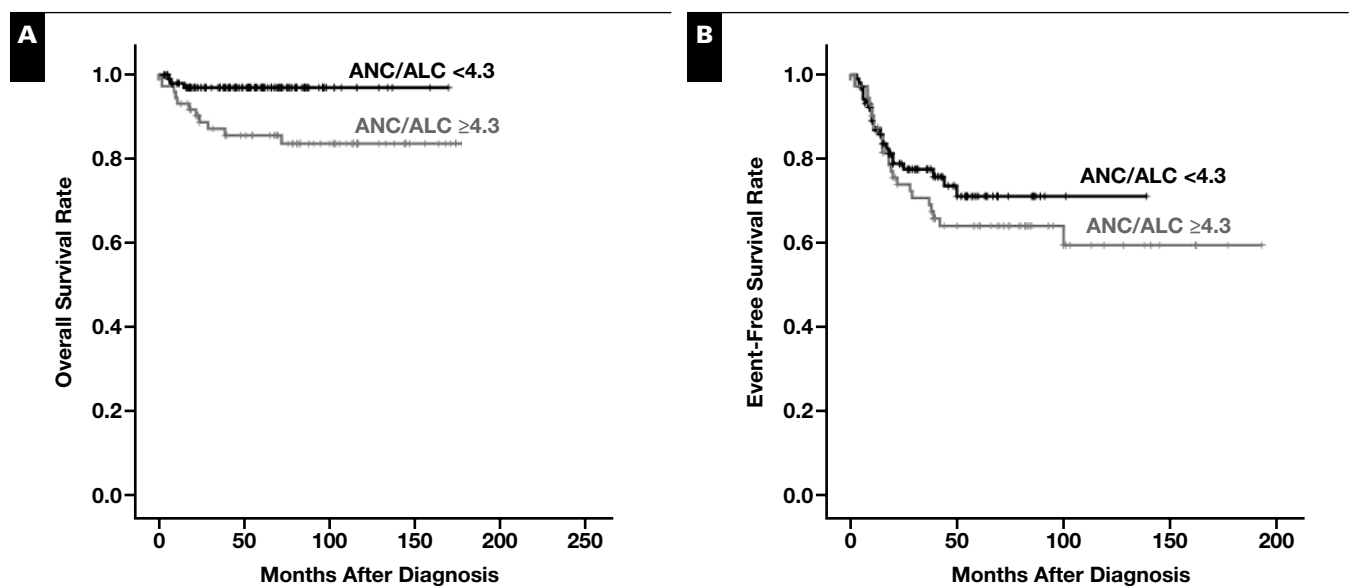

**Figure 7** Overall survival (**A**) and event-free survival (**B**) according to the ratio of absolute neutrophil count to absolute lymphocyte count (ANC/ALC) in patients with the nodular sclerosis subtype ( $n = 144$ ). (**A**,  $P = .008$ ; **B**,  $P = .362$ .)

Many cytokines that may contribute to the accumulation of neutrophils, such as granulocyte macrophage–colony stimulating factor, transforming growth factor  $\beta$ , and interleukin (IL)-8, are expressed by Reed-Sternberg cell lines and primary cHL tissues.<sup>25</sup> In particular, IL-8 is a cytokine that strongly attracts and activates neutrophils.<sup>26,27</sup> Previous studies indicate that IL-8 may play a role in the pathogenesis of HL. First, increased IL-8 levels have been detected in the serum samples of many patients with HL.<sup>28-30</sup> Second, in situ hybridization detected IL-8 messenger RNA in 20 of 33 cHL cases, and its expression level correlated positively with the density of neutrophils in the tissue.<sup>31</sup> IL-8 is also predominantly expressed by the reactive infiltrate cells; it was expressed by Reed-Sternberg cells in 3 cases only.<sup>31</sup>

Neutrophils are among the first inflammatory cells to respond to infectious agents. They are the most abundant type of WBCs, and an increase in neutrophil numbers is the most common cause of leukocytosis. In the present study, a high ANC/ALC ratio was associated with leukocytosis. However, leukocytosis per se did not correlate with survival outcome.

Previous research found that lymphopenia was related to adverse prognosis.<sup>1</sup> However, lymphopenia is a rather infrequent finding in patients with cHL and was seen in only 11% of patients in the original study<sup>1</sup> and in 8% of patients in the present study, which limits its usefulness. Moreover, in multivariate analysis that included lymphopenia criteria, the ANC/ALC ratio remained an independent prognostic factor along with IPS. These results suggest that the ANC/ALC ratio could provide additional prognostic information.

In the present study, a high ANC/ALC ratio was not significantly associated with EFS. The reason for this is largely unknown. A possible explanation could be that patients with an ANC/ALC ratio of 4.3 or more are more difficult to salvage after treatment failure or relapse: 13 (27.7%) of 47 patients with an ANC/ALC ratio less than 4.3 died after treatment failure or relapse, compared with 32 (60.4%) of 53 patients with an ANC/ALC ratio  $\geq 4.3$ . This indicates that cases with an ANC/ALC ratio of 4.3 or more may be more resistant to salvage treatment.

Myeloid lineage cells with immunosuppressive properties, recently categorized as myeloid-derived suppressor cells (MDSCs), were previously correlated with cellular immunosuppression in a number of disease states.<sup>32</sup> In most cases, MDSCs can be subdivided into 2 phenotypic populations with either monocytic or neutrophilic characteristics.<sup>33</sup> The ability of normal neutrophils to suppress T-cell function was reported previously<sup>21</sup> and was linked to immunosuppression in non–small cell lung, pancreatic, colon, renal, and breast cancer.<sup>34-36</sup> Activated neutrophils have enhanced activity of signal transducer and activator of transcription 3 and nicotinamide adenine dinucleotide phosphate, resulting

in high levels of reactive oxygen species but low nitric oxide production. Finally, activated neutrophils have increased levels of arginase 1, which result in T-cell suppression.<sup>32</sup> In addition to this immune suppression, neutrophils may have additional tumor-promoting ability. Increased neutrophil counts have been observed in patients with gastric, hepatic, cervical, and colorectal cancer.<sup>37</sup> Moreover, recruited neutrophils, along with tumor-associated macrophages, can induce the expression of matrix metalloproteinase 9 in various murine tumor models.<sup>38</sup> CXCL1/MIP-2, an angiogenic chemokine, is associated with neutrophil recruitment and induces vascular endothelial growth factor production in neutrophils, resulting in angiogenesis in vivo.<sup>39</sup> Finally, infiltration with large numbers of peritumoral neutrophils is associated with progression of angiogenesis at the edge of hepatocellular carcinoma.<sup>40</sup> These observations support the notion that neutrophils may participate in driving cancer invasion, angiogenesis, and metastasis.

Many investigators, including the present authors, validated the adverse prognostic effect of high tissue-associated macrophage contents using immunohistochemical staining for CD68 and/or CD163 in cHL.<sup>5-7</sup> Furthermore, our previous study demonstrated that the ALC/AMC ratio correlated with tissue-associated macrophage contents and survival outcome. In this study, the ANC/ALC and ALC/AMC ratios showed a significant synergistic effect on the prediction of survival in cHL patients; patients with a high ANC/ALC ratio and a low ALC/AMC ratio had the worst survival, whereas patients with a low ANC/ALC ratio and a high ALC/AMC ratio had the best survival. The reason for this is still poorly understood but may involve the complex feedback loops of the MDSCs.

In conclusion, the present results suggest that the ANC/ALC ratio can be used to determine prognosis in cHL. This supports the possibility that host immunity (ie, lymphocytes) and inflammatory responses (ie, neutrophils) have prognostic relevance for clinical outcomes in cHL. Moreover, the ANC/ALC ratio may provide additional prognostic information independently from IPS and has a synergistic effect with the ALC/AMC ratio for survival prediction of cHL. Further prospective clinical trials are required to investigate the effect of the ANC/ALC ratio on clinical outcomes and to confirm the present findings.

*From the Departments of <sup>1</sup>Pathology, <sup>2</sup>Oncology, and <sup>3</sup>Internal Medicine, Asan Medical Center, University of Ulsan College of Medicine, Seoul, South Korea; and <sup>4</sup>Department of Pathology, Seoul National University College of Medicine, Seoul, South Korea.*

*This study was supported by a grant (2011-090) from the Asan Institute for Life Sciences, Seoul, South Korea.*

*Address reprint requests to Dr Huh: Department of Pathology, University of Ulsan College of Medicine, Asan Medical Center, 88, Olympic-ro 43-gil, Seoul 138-736, Korea; jrhu@amc.seoul.kr.*

## References

1. Hasenclever D, Diehl V. A prognostic score for advanced Hodgkin's disease. International Prognostic Factors Project on Advanced Hodgkin's Disease. *N Engl J Med.* 1998;339:1506-1514.
2. Duggan DB, Petroni GR, Johnson JL, et al. Randomized comparison of ABVD and MOPP/ABV hybrid for the treatment of advanced Hodgkin's disease: report of an intergroup trial. *J Clin Oncol.* 2003;21:607-614.
3. Bjorkholm M, Axdorph U, Grimfors G, et al. Fixed versus response-adapted MOPP/ABVD chemotherapy in Hodgkin's disease: a prospective randomized trial. *Ann Oncol.* 1995;6:895-899.
4. Sanchez-Aguilera A, Montalban C, de la Cueva P, et al. Tumor microenvironment and mitotic checkpoint are key factors in the outcome of classic Hodgkin lymphoma. *Blood.* 2006;108:662-668.
5. Steidl C, Lee T, Shah SP, et al. Tumor-associated macrophages and survival in classic Hodgkin's lymphoma. *N Engl J Med.* 2010;362:875-885.
6. Kamper P, Bendix K, Hamilton-Dutoit S, et al. Tumor-infiltrating macrophages correlate with adverse prognosis and Epstein-Barr virus status in classical Hodgkin's lymphoma. *Haematologica.* 2011;96:269-276.
7. Yoon DH, Koh YW, Kang HJ, et al. CD68 and CD163 as prognostic factors for Korean patients with Hodgkin lymphoma. *Eur J Haematol.* 2012;88:292-305.
8. Mocikova H, Pytlík R, Markova J, et al. Pre-transplant positron emission tomography in patients with relapsed Hodgkin lymphoma. *Leuk Lymphoma.* 2011;52:1668-1674.
9. Purz S, Mauz-Korholz C, Korholz D, et al. [18F] Fluorodeoxyglucose positron emission tomography for detection of bone marrow involvement in children and adolescents with Hodgkin's lymphoma. *J Clin Oncol.* 2011;29:3523-3528.
10. Alvaro-Naranjo T, Lejeune M, Salvado-Usach MT, et al. Tumor-infiltrating cells as a prognostic factor in Hodgkin's lymphoma: a quantitative tissue microarray study in a large retrospective cohort of 267 patients. *Leuk Lymphoma.* 2005;46:1581-1591.
11. Schreck S, Friebe D, Buettner M, et al. Prognostic impact of tumour-infiltrating Th2 and regulatory T cells in classical Hodgkin lymphoma. *Hematol Oncol.* 2009;27:31-39.
12. Porrata LF, Ristow K, Colgan J, et al. Peripheral blood lymphocyte/monocyte ratio at diagnosis and survival in classical Hodgkin lymphoma. *Haematologica.* 2012;97:262-269.
13. Koh YW, Kang HJ, Park C, et al. The ratio of the absolute lymphocyte count to the absolute monocyte count is associated with prognosis in Hodgkin's lymphoma: correlation with tumor-associated macrophages. *Oncologist.* 2012;17:871-880.
14. Shimada H, Takiguchi N, Kainuma O, et al. High preoperative neutrophil-lymphocyte ratio predicts poor survival in patients with gastric cancer. *Gastric Cancer.* 2010;13:170-176.
15. Sharaiha RZ, Halazun KJ, Mirza F, et al. Elevated preoperative neutrophil-lymphocyte ratio as a predictor of postoperative disease recurrence in esophageal cancer. *Ann Surg Oncol.* 2011;18:3362-3369.
16. Porrata LF, Ristow K, Habermann T, et al. Predicting survival for diffuse large B-cell lymphoma patients using baseline neutrophil/lymphocyte ratio. *Am J Hematol.* 2010;85:896-899.
17. Borsig L, Wong R, Hynes RO, et al. Synergistic effects of L- and P-selectin in facilitating tumor metastasis can involve non-mucin ligands and implicate leukocytes as enhancers of metastasis. *Proc Natl Acad Sci U S A.* 2002;99:2193-2198.
18. Rotondo R, Bertolotto M, Barisione G, et al. Exocytosis of azurophil and arginase 1-containing granules by activated polymorphonuclear neutrophils is required to inhibit T lymphocyte proliferation. *J Leukoc Biol.* 2011;89:721-727.
19. Petrie HT, Klassen LW, Kay HD. Inhibition of human cytotoxic T lymphocyte activity in vitro by autologous peripheral blood granulocytes. *J Immunol.* 1985;134:230-234.
20. el-Hag A, Clark RA. Immunosuppression by activated human neutrophils. Dependence on the myeloperoxidase system. *J Immunol.* 1987;139:2406-2413.
21. Munder M, Schneider H, Luckner C, et al. Suppression of T-cell functions by human granulocyte arginase. *Blood.* 2006;108:1627-1634.
22. Inoue H. Overview of automated hematology analyzer: XE-2100TM. *Sysmex J.* 1999;9:58-64.
23. Huh J, Cho K, Heo DS, et al. Detection of Epstein-Barr virus in Korean peripheral T-cell lymphoma. *Am J Hematol.* 1999;60:205-214.
24. Tzankov A, Zlobec I, Went P, et al. Prognostic immunophenotypic biomarker studies in diffuse large B cell lymphoma with special emphasis on rational determination of cut-off scores. *Leuk Lymphoma.* 2010;51:199-212.
25. Skinnider BF, Mak TW. The role of cytokines in classical Hodgkin lymphoma. *Blood.* 2002;99:4283-4297.
26. Baggolini M, Walz A, Kunkel SL. Neutrophil-activating peptide-1/interleukin 8, a novel cytokine that activates neutrophils. *J Clin Invest.* 1989;84:1045-1049.
27. Baggolini M, Dewald B, Moser B. Interleukin-8 and related chemotactic cytokines--CXC and CC chemokines. *Adv Immunol.* 1994;55:97-179.
28. Trumper L, Jung W, Dahl G, et al. Interleukin-7, interleukin-8, soluble TNF receptor, and p53 protein levels are elevated in the serum of patients with Hodgkin's disease. *Ann Oncol.* 1994;5(suppl 1):93-96.
29. Gorschluter M, Bohlen H, Hasenclever D, et al. Serum cytokine levels correlate with clinical parameters in Hodgkin's disease. *Ann Oncol.* 1995;6:477-482.
30. Luciani MG, Stoppacciaro A, Peri G, et al. The monocyte chemotactic protein 1 (MCP-1) and interleukin 8 (IL-8) in Hodgkin's disease and in solid tumours. *Mol Pathol.* 1998;51:273-276.
31. Foss HD, Herbst H, Gottstein S, et al. Interleukin-8 in Hodgkin's disease: preferential expression by reactive cells and association with neutrophil density. *Am J Pathol.* 1996;148:1229-1236.
32. Gabrilovich DI, Nagaraj S. Myeloid-derived suppressor cells as regulators of the immune system. *Nat Rev Immunol.* 2009;9:162-174.
33. Movahedi K, Guillemins M, Van den Bossche J, et al. Identification of discrete tumor-induced myeloid-derived suppressor cell subpopulations with distinct T cell-suppressive activity. *Blood.* 2008;111:4233-4244.
34. Schmielau J, Finn OJ. Activated granulocytes and granulocyte-derived hydrogen peroxide are the underlying mechanism of suppression of t-cell function in advanced cancer patients. *Cancer Res.* 2001;61:4756-4760.
35. Zea AH, Rodriguez PC, Atkins MB, et al. Arginase-producing myeloid suppressor cells in renal cell carcinoma patients: a mechanism of tumor evasion. *Cancer Res.* 2005;65:3044-3048.



36. Rotondo R, Barisione G, Mastracci L, et al. IL-8 induces exocytosis of arginase 1 by neutrophil polymorphonuclears in nonsmall cell lung cancer. *Int J Cancer*. 2009;125:887-893.
37. Wu Y, Zhao Q, Peng C, et al. Neutrophils promote motility of cancer cells via a hyaluronan-mediated TLR4/PI3K activation loop. *J Pathol*. 2011;225:438-447.
38. Coussens LM, Tinkle CL, Hanahan D, et al. MMP-9 supplied by bone marrow-derived cells contributes to skin carcinogenesis. *Cell*. 2000;103:481-490.
39. Scapini P, Morini M, Tecchio C, et al. CXCL1/macrophage inflammatory protein-2-induced angiogenesis in vivo is mediated by neutrophil-derived vascular endothelial growth factor-A. *J Immunol*. 2004;172:5034-5040.
40. Kuang DM, Zhao Q, Wu Y, et al. Peritumoral neutrophils link inflammatory response to disease progression by fostering angiogenesis in hepatocellular carcinoma. *J Hepatol*. 2011;54:948-955.

# First and Only FDA Cleared Digital Cytology System

**Genius™ Cervical AI**

**Genius™ Review Station**

**Genius™ Digital Imager**

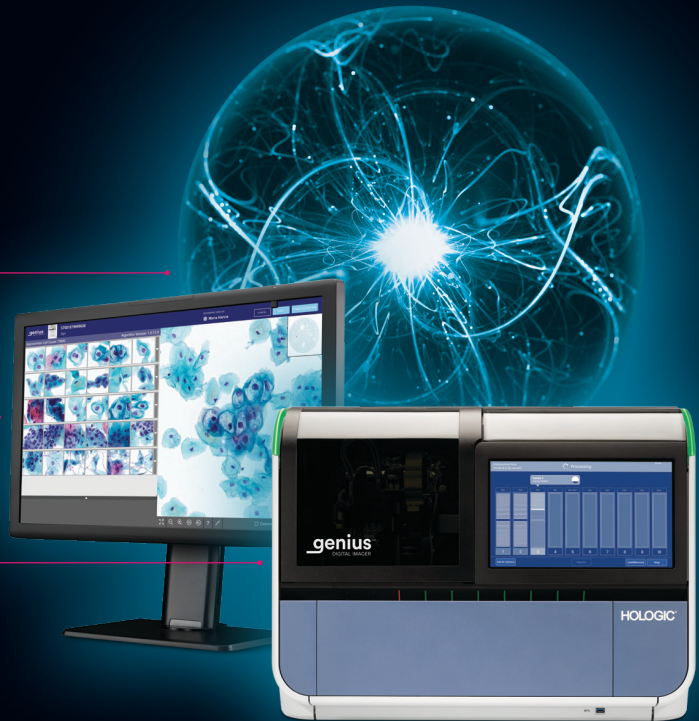

## Empower Your Genius With Ours

**Make a Greater Impact on Cervical Cancer**  
with the Advanced Technology of the  
Genius™ Digital Diagnostics System

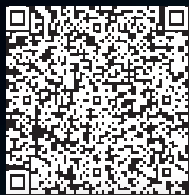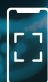

Click or Scan  
to discover more

ADS-04159-001 Rev 001 © 2024 Hologic, Inc. All rights reserved. Hologic, Genius, and associated logos are trademarks and/or registered trademarks of Hologic, Inc. and/or its subsidiaries in the United States and/or other countries. This information is intended for medical professionals in the U.S. and other markets and is not intended as a product solicitation or promotion where such activities are prohibited. Because Hologic materials are distributed through websites, podcasts and tradeshows, it is not always possible to control where such materials appear. For specific information on what products are available for sale in a particular country, please contact your Hologic representative or write to [diagnostic.solutions@hologic.com](mailto:diagnostic.solutions@hologic.com).

**genius™**  
DIGITAL DIAGNOSTICS
